# Supplementary material
Source: Springer Nature journal article supplement (https://www.springermedizin.de/resource/supplementary/12936_2010_1666_MOESM6_ESM.pdf/9542312)

proportion antibody positive

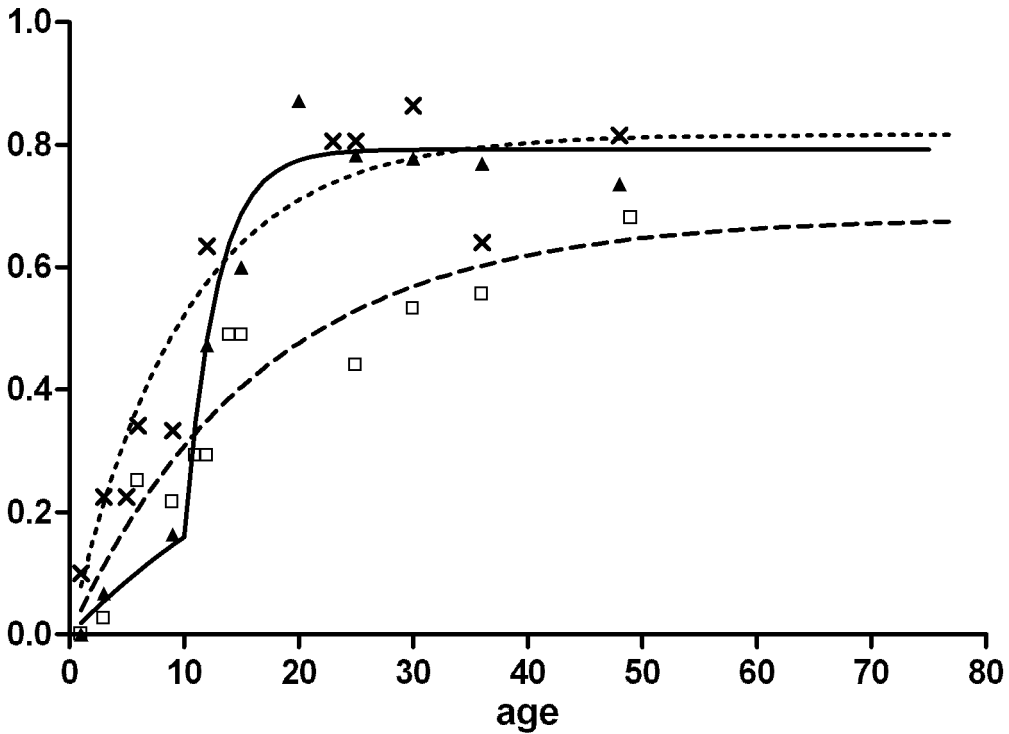

x ..... Sumve      ▲ — Biharamulo      □ ---- Rubya

Supplement: MOESM6 [file 9542312]
